# Supplementary material for: How attention and knowledge modulate memory: The differential impact of cognitive conflicts on subsequent memory—A review of a decade of research
Source: Frontiers journal article supplement (doi:10.3389/fcogn.2023.1125700), 2023-03-23
Supplement: Table_1.xlsx [file Table_1.xlsx]

## Sheet: Tabelle1
Study	Paradigm	Memory effect
Attentional mechanisms
Greene et al., 2017	Inattentional blindness / Perceptual load (PL)	High PL leads to increase for targets / decrease for distractors
Nussenbaum et al., 2017	Visual search / Perceptual load (PL)	High PL leads to increase for targets / decrease for distractors
Craik et al., 2018	Divided attention (DA)	DA leads to decrease for targets
Greene & Naveh-Benjamin, 2022	Divided attention	DA leads to decrease for targets
Uncapher & Rugg, 2005	Divided attention	DA leads to decrease for targets
Brito et al., 2016	Task switching (TS)	TS leads to decrease for targets
Chiu & Egner, 2016	Task switching	TS leads to reduced memory selectivity
Dubravac & Meier, 2020	Task switching	TS leads to reduced memory selectivity
Dubravac & Meier, 2022	Task switching	TS leads to reduced memory selectivity
Muhmenthaler & Meier, 2019	Task switching	TS leads to decrease for targets
Muhmenthaler & Meier, 2022	Task switching	TS leads to decrease for targets
Reynolds et al., 2004	Task switching	TS leads to decrease for targets
Richter & Yeung, 2012	Task switching	TS leads to reduced memory selectivity
Richter & Yeung, 2015	Task switching	TS leads to reduced memory selectivity
Davis et al., 2020	Stroop like conflict	Incongruence leads to increase for targets (but blocked list > randomized list)
Jiménez et al., 2020	Stroop like conflict	Incongruence leads to increase for targets (but two succsessive incongruent trials necessary)
Krebs et al., 2015	Stroop like conflict	Incongruence leads to increase for targets
Muhmenthaler & Meier, 2021a, Exp. 2-4	Stroop like conflict & Task Switching	Incongruence leads to increase for targets (when lists are blocked), TS leads to decrase for targets (additive)
Ptok et al., 2019	Stroop like conflict	Incongruence leads to increase for targets (when the "semantic" conflict is obvious)
Ptok et al., 2021	Stroop like conflict	Incongruence leads to increase for targets (when the "semantic" conflict is obvious)
Rosner, D'Angelo, et al., 2015	Stroop like conflict	Incongruence leads to increase for targets
Muhmenthaler & Meier, 2021b	Flanker like conflict	Incongruence leads to increase for targets
LaPointe et al., 2022	Attentional boost (AB) & Perceptual disfluency (PD)	AB condition leads to increase for targets, PD leads to increase for targets (additive)
Swallow & Jiang, 2010	Attentional boost	AB condition leads to increase for targets
Diemand-Yauman, 2011	Perceptual disfluency (PD)	PD leads to increase for targets
Eitel et al., 2014	Perceptual disfluency	no effect
Muhmenthaler & Meier, 2021a, Exp.1	Perceptual disfluency & Task Switching	PD leads to decrease for targets, TS leads to decrease for targets (additive)
Rosner, Davis, et al., 2015	Perceptual disfluency	PD leads to increase for targets
Rummer et al., 2016	Perceptual disfluency	no effect
Seufert et al., 2017	Perceptual disfluency	PD leads to increase for targets, depending on disfluency level
Sungkhasettee, 2011	Perceptual disfluency (+ Judgment of Learning (JOL))	PD leads to increase for targets, JOL higher for disfluent targets
Weissgerber & Reinhard, 2017	Perceptual disfluency	PD leads to increase for targets
Yue et al., 2013	Perceptual disfluency (+ Judgment of Learning)	PD leads to decrease for targets, JOL higher for fluent targets
Knowledge structures
Cortese et al., 2019	Schema congruency	Increase for schema-congruent information
Hennies et al., 2016	Schema congruency	Increase for schema-congruent information
Van Kesteren, Beul, et al., 2013	Schema congruency	Increase for schema-congruent information
van Kesteren, Rijpkema, et al., 2013	Schema congruency	Increase for schema-congruent information (consolidation necessary)
Ortiz-Tudela et al., 2017	Change detection	Increase for schema-congruent information
Bonasia et al., 2018	Schema congruency / Novelty	U-shape, Increase for schema-congruent and novel information
Reggev et al., 2018	Schema congruency / Novelty	U-shape, Increase for schema-congruent and novel information
Bein et al., 2021	Expectation violation	Increase for unexpected information
Greve et al., 2017	Expectation violation	Increase for unexpected information
Greve et al., 2019	Expectation violation	U-shape, increase for expected and unexpected information
Ortiz-Tudela et al., 2018	Expectation violation	no effect
Quent et al., 2021	Expectation violation	U-shape, Increase for expected and unexpected information
